# Supplementary material
Source: MDPI journal article supplement (https://www.mdpi.com/2072-4292/13/17/3407)
Supplement: s1 [file s1]

## Supplementary

# Impacts of saline-alkali land improvement on regional climate: process, mechanisms, and implications

Lingxue Yu <sup>1,5</sup>, Jiuchun Yang<sup>1</sup>, \*, Kun Bu<sup>1</sup>, Tingxiang Liu <sup>2</sup>, Yue Jiao <sup>1,3</sup>, Guangshuai Li <sup>1,2</sup>, Luoman Pu <sup>4</sup> and Shuwen Zhang <sup>1</sup>

<sup>1</sup> Northeast Institute of Geography and Agroecology, Chinese Academy of Sciences, Changchun, China; [yulingxue@iga.ac.cn](mailto:yulingxue@iga.ac.cn)

<sup>2</sup> College of Geography Science, Changchun Normal University, Changchun, China; [liutingxiang@ccsfu.edu.cn](mailto:liutingxiang@ccsfu.edu.cn)

<sup>3</sup> Liaoning Normal University, Dalian, China; [jiaoyue@iga.ac.cn](mailto:jiaoyue@iga.ac.cn)

<sup>4</sup> School of Public Administration, Hainan University, Haikou 570228, China; [994424@hainanu.edu.cn](mailto:994424@hainanu.edu.cn)

<sup>5</sup> Changchun Jingyuetan Remote Sensing Observation Station, Chinese Academy of Sciences, Changchun 130102, China

\* Correspondence: [yangjiuchun@iga.ac.cn](mailto:yangjiuchun@iga.ac.cn)

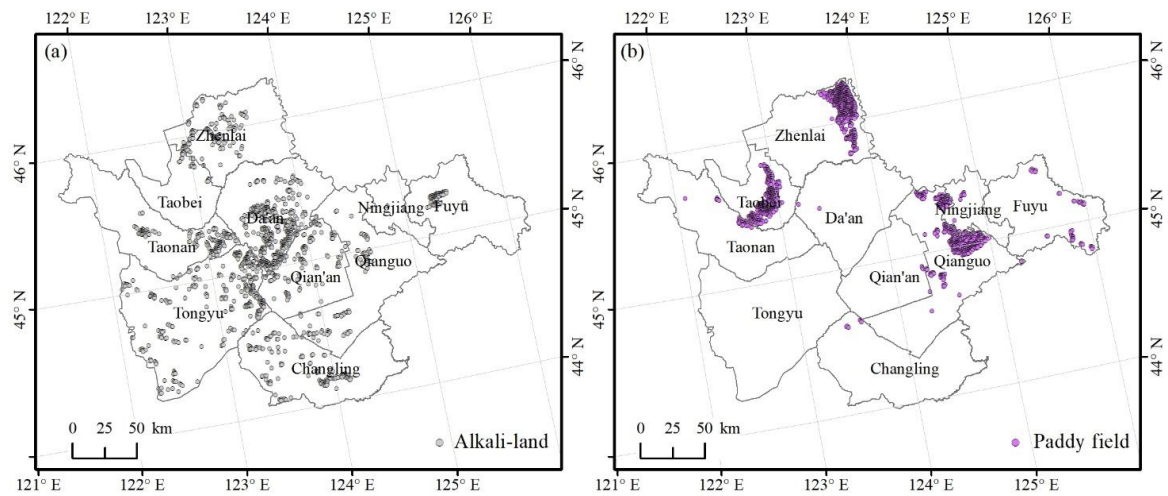

**Figure S1.** Pure pixels for saline-alkali land (a) and paddy field (b) at a 1 km×1 km spatial resolution.
